# Supplementary material for: Functional Evolution of a Bark Beetle Odorant Receptor Clade Detecting Monoterpenoids of Different Ecological Origins
Source: PubMed Central journal article supplement — Mol Biol Evol. 2021 Jul 22;38(11):4934–47. doi: 10.1093/molbev/msab218 (PMC8557457; doi:10.1093/molbev/msab218), 2021-07-22
Supplement: msab218_supplementary_data.pdf [file msab218_supplementary_data.pdf]

## Supplementary Material

### **Functional evolution of a bark beetle odorant receptor clade detecting monoterpenoids of different ecological origins**

Xiao-Qing Hou<sup>1</sup>, Jothi Kumar Yuvaraj<sup>1</sup>, Rebecca E. Roberts<sup>1</sup>, Dan-Dan Zhang<sup>1</sup>, C. Rikard Unelius<sup>2</sup>, Christer Löfstedt<sup>1</sup>, Martin N. Andersson<sup>1\*</sup>

<sup>1</sup> Department of Biology, Lund University, Lund, Sweden

<sup>2</sup> Faculty of Health and Life Sciences, Linnaeus University, Kalmar, Sweden

\*Corresponding author: Martin N. Andersson

Department of Biology, Sölvegatan 37, 223 62 Lund, Sweden.

Email: martin\_n.andersson@biol.lu.se

Phone: +46-(0)462229344

**Table S1.** List of compounds initially tested on all five ORs, with purity, source and examples of biological origin.

| Class                                                       | Compound                            | Purity (%)    | Source*                | Biological origin |
|-------------------------------------------------------------|-------------------------------------|---------------|------------------------|-------------------|
| Oxygenated monoterpenoids, homoterpenoids, and hemiterpenes | (1S,4S)- <i>cis</i> -Verbenol       | 95            | Borregaard             | Beetle            |
|                                                             | (1R,4R)-(+)- <i>trans</i> -Verbenol | 92            | SCM                    | Beetle            |
|                                                             | (1S,4S)-(-)- <i>trans</i> -Verbenol | 97            | SciTech Ltd., Prague   | Beetle            |
|                                                             | (1S)-(-)- <i>cis</i> -Verbenone     | >99           | Fluka                  | Beetle, fungi     |
|                                                             | (±)-Ipsdienol                       | 94            | Bedoukian              | Beetle            |
|                                                             | (±)-Ipsenol                         | 95            | Synergy Semiochemicals | Beetle            |
|                                                             | Amitinol                            | 91            | R. U.                  | Beetle            |
|                                                             | (+)- <i>trans</i> -4-Thujanol       | 97            | Sigma-Aldrich          | Host, fungi       |
|                                                             | (±)-Grandisol (grandlure I)         | 95            | Bedoukian (E. W.)      | Beetle            |
|                                                             | Geranylacetone                      | >99           | Fluka                  | Non-host, fungi   |
|                                                             | (+)-Isopinocampone                  | >99           | R. U.                  | Host, fungi       |
|                                                             | 1,8-Cineole                         | 99            | Aldrich                | Host              |
|                                                             | α-Isophorone                        | >99           | Acros                  | **                |
|                                                             | Lanierone                           | >99           | Synergy Semiochemicals | Beetle            |
|                                                             | 2-Methyl-3-buten-2-ol               | >99           | Acros                  | Beetle, fungi     |
| Monoterpenes                                                | (+)-α-Pinene                        | 98            | Janssen Chimica        | Host              |
|                                                             | Myrcene                             | 95            | Sigma-Aldrich          | Host              |
|                                                             | <i>p</i> -Cymene                    | >99           | Acros                  | Host              |
|                                                             | (+)-3-Carene                        | 99            | Aldrich                | Host              |
| Aliphatic alcohols and spiroacetals                         | (±)-3-Octanol                       | 97            | Sigma-Aldrich          | Non-host, fungi   |
|                                                             | (±)-1-Octen-3-ol                    | 98            | Janssen Chimica        | Non-host, fungi   |
|                                                             | 1-Hexanol                           | >99           | Fluka                  | Non-host, fungi   |
|                                                             | Ethanol                             | 99.5          | Solveco                | Host              |
|                                                             | (5S,7S)- <i>trans</i> -Conophthorin | 94            | W. F.                  | Non-host, fungi   |
| Aromatic compounds                                          | 2-Phenylethanol                     | >99           | Sigma                  | Beetle, fungi     |
|                                                             | Acetophenone                        | 99            | Acros                  | Beetle, fungi     |
|                                                             | Styrene                             | >99           | Fluka                  | Fungi             |
|                                                             | 4-Vinylanisole                      | 97            | Aldrich                | Fungi             |
|                                                             | Estragole (4-allylanisole)          | >99           | Aldrich                | Host, fungi       |
|                                                             | 3,4-Dimethoxytoluene                | 98            | Givaudan-Roure         | Host, fungi       |
|                                                             | Eugenol methyl ether                | >99           | Fluka                  | Host, fungi       |
| 4-Ethylguaiaicol                                            | 98                                  | Sigma-Aldrich | Fungi                  |                   |

\*R. U. = synthesized by Rikard Unelius (Linnaeus University, Kalmar, Sweden); W. F. = gift from Wittko Francke (University of Hamburg, Germany). \*\*: The biological source of α-isophorone is unknown. Female *Ips typographus* produce tiny amounts of β-isophorone which is unstable, and we found that α-isophorone was more active than β-isophorone in SSR study (Kandasamy et al., in prep); we hence tested α-isophorone in this study.

**Table S2.** Additional OR-specific compounds, with purity, source, examples of biological origin and target ORs. For consistency, these compounds were also tested on non-target ORs showing no (or insignificant) activity.

| Class                     |                     | Purity (%)*  | Source** | Biological origin | Target OR |
|---------------------------|---------------------|--------------|----------|-------------------|-----------|
| Oxygenated monoterpenoids | (S)-(+)-Ipsdienol   | 99 (98% ee)  | A. M.    | Beetle            | ItypOR28  |
|                           | (R)-(-)-Ipsdienol   | 99 (98% ee)  | A. M.    | Beetle            | ItypOR28  |
|                           | (-)-Terpinene-4-ol  | 99           | Acros    | Host, fungi       | ItypOR23  |
|                           | (±)-Camphor         | 97           | Aldrich  | Host, fungi       | ItypOR29  |
|                           | (-)-Pinocarvone     | 99           | Y. N.    | Beetle, fungi     | ItypOR29  |
|                           | (+)-Pinocamphone    | 84 (16% IPC) | R. U.    | Host, fungi       | ItypOR29  |
|                           | (-)-Pinocamphone    | 81 (19% IPC) | R. U.    | Host, fungi       | ItypOR29  |
|                           | (-)-Isopinocamphone | 99           | R. U.    | Host, fungi       | ItypOR29  |
| Monoterpene               | γ-Terpinene         | 97           | Aldrich  | Host              | ItypOR27  |

Abbreviations: ee = Enantiomeric excess; IPC= isopinocamphone.

\*\* R. U. = synthesized by Rikard Unelius (Linnaeus University, Kalmar, Sweden); A. M. = synthesized by Aleš Machara (Academy of Sciences of the Czech Republic, Prague); Y. N. = gift from Yoko Nakamura (Max Planck Institute for Chemical Ecology, Jena, Germany).

**Table S3.** Three compounds only tested on ItypOR28, with purity, source, and examples of biological origin.

| Class                     | Compound           | Purity (%) | Source*                | Biological origin |
|---------------------------|--------------------|------------|------------------------|-------------------|
| Oxygenated monoterpenoids | <i>E</i> -Myrcenol | >99        | Fytofarm               | Beetle            |
|                           | (±)-Myrtenol       | 96         | G. B.                  | Beetle, fungi     |
| Bicyclic acetal           | (±)-Frontalin      | >99        | Synergy Semiochemicals | Beetle            |

\* G. B. = gift from Gunnar Bergström (University of Gothenburg, Sweden).

**Table S4.** Primers used in this study.

| Genes      | Primer sequence (5'-3')                     |
|------------|---------------------------------------------|
| ItypOR23_F | CGCGGATCCGCCACCATGGCCGTGTATCCAAAATCAG       |
| ItypOR23_R | GCTCTAGATTAAGTTCTTTTGTATGCTAGAGTAATATAAGAAT |
| ItypOR25_F | CGCGGATCCGCCACC ATGAAGATTTACCCTGACACAAAGT   |
| ItypOR25_R | GCTCTAGA CTATCGAAACATGATAGTAATATAGGTGTAGG   |
| ItypOR27_F | CGCGGATCCGCCACC ATGAGAGTGTATCCGGACATAGAA    |
| ItypOR27_R | GCTCTAGATTAGTTGTTTCGGACTACCACG              |
| ItypOR28_F | CGCGGATCCGCCACC ATGGGATTGTATCCAGCAAGTAGA    |
| ItypOR28_R | GCTCTAGATTAATTTCTAAGAATTACCGATATGTAGGTGT    |
| ItypOR29_F | CGCGGATCCGCCACCATGGCTGCTTATCCACAATGC        |
| ItypOR29_R | GCTCTAGACTATTGCCTAAAAATAATACTCACATAGGAATAA  |
| Sp6        | ATTTAG GTGACACTATAG                         |
| EBV-rev    | GTGGTTTGTCCAAACTCATC                        |

## Amino acid sequences of the five ItypORs

>ItypOR23

MAVYPKSEHLKVP AIY CSTIGIFPWKFMFQDNKNLQTIYRCYSIVMLAWCIGFVVTDYIQLVILLTSKTLDMQEISFN  
 TCITLLFTICIGLRVIVYFSPNSANLIQSIIDSEKVTYLDDAECMKLEKEHLRSVRLISHCYFIFIIFSTTSRCVYFFSKE  
 PDFIQNGNETEIVKEHMLSIWFPFNQEKYYLTVYNIELLD SFLGTFVAYVDIYTFNMISYPKGQLKLLQHIMKHFH  
 NYKAKYSSETNEENDFIVFKDLVQRHKQIIQHINAFNELMEFVAIFEFVQSSAQIACGLTQTSLENLTIGSFLFVMSF  
 LISMLVRLFLYAAAANDVTVESTKLAQCIWESN WYEEESQIKLSMLMVIIRAQKPLIFKIGGFGTMSVQSIVTILKATY  
 SYITLAKRT

>ItpOR25

MKIYPDTKFFDVTAKFGAIVGLYPWQFMFPDNNCTCRQIYRWYSYIVLLSFIVLLLPMYVELIILLRNEETSKDELGSN  
LSITIVFSSAGLRALFLRRGSNLINLIQNVMDDEEKQLFVDCKKVLLEDKCLKVVRKLSYIYAVIVVVAASQKSVTA  
LLQTPTSSTGTPSRDLIISAWFPFDKQEYYWQAYCIQIYHTIIGASYLSYMDIFMFNLLSYPIGQFKKLQFIKNMEVQ  
HYSYNDSENKSIDDGVRSIERHQYIIQYVDFYNKSMGTFFALDFLQSSLQIATVLLQFSPTVGTIIFMLIFFALMLLR  
LFLYYYTANEVSVQSEKVKMAVWESKWYEQPPKIKYALLRIMTRAAPSKYIIGAFGGMSTYSIIQILKATYTYITIM  
FR

>ItpOR27

MRVYDPDIENFKITAIYSSTIGLFPWKFMFQDNQVLQQTYRYYSYFIYGSFVIFITAYVELIIMLNGDVLKMDAICSNIC  
LTLAFTCSALRATVMRVGPNLLKIIEQVMHAEKNPASIEDQTSFNLERKSIKTMRKLSHLAYAVAITMIASSKCALAPF  
EKGEIVHIGNTTIIDRPLIMSAWVPFNKNTHYWAAYIIQIYFAALGAWHVAYVDMFMFNMLGYPIGQLKKLHYYIKNI  
TTLTRNDDSLEEFKNVIRQHQQIISYVKFYNDMSGTFAIFFLQSSVQIASIFIQTSPSDMNLGQFGFIGGFFIGMLF  
RLFLYYYTANEVMTSEKVGVSWEVDWYEQPTNLKSMALLTVMMRGQRPLYKIGGFGLMSVQSIVAILKATYT  
YLTVVVRNN

>ItpOR28

MGLYPASRYFKNPIMWSSILGAFPWQMIFQENAKLQQVYRWYSNFMLTWYFGMVTTEYIQLYHILNANVIQMD  
VCENVCMSLVFTCTGLRVVVMRRRTNGLSEIIQTVVDAEREADGLDDEKTRQYEDIHVKHMEKVSFIYAAFVFMV  
TNGCLATLYADTKSVIIGNSTIVEKPLIISTWFPFDKNEHYWVAYGLQVFDGYMAALTVACTDILMFNMISYPIGQLT  
KLQHLVRNMAVYKTHFEAFPTFTKIVQRHKHVIKYVELFNQSMGTFAIFEFVQSSVQIASVLVQTSPDDLTLMSFC  
FIVLFFTSMLTRLFMYYYSANEVIIQISINLGDSVWESSWYHQPHQLKQAMLMVLVRAQKPVSYKIGGFGLMSVQSIV  
VAILKATYTYISVILRN

>ItpOR29

MAAYPQCKNLRVAIYSSIIIGVFPWQFMFQHNHLRQTLYRWYSVFLHFWFSGFIITEYIELYLQCTADELKLDEICA  
NICVVMVFTSTAVRQLVMRFNKMVNDLIQSIIDEKHNDFLEDDKTREIEDKFIKSSDSISNWWYAAPVYITLFQYVLF  
PMMSKPDIIQIGNTTQALRPLIVDSWFPFDKMEYYWIVYVLQFLDLLIGALYVTYLHILMFNMYRYPVAQLKKLQHV  
LRNFGRYKVEYMRQSNCEYISALVVFRECIKHKHKIIQYVDGINECMSTYTVDFLQSSVQIAALLVQTSPNDMTF  
ISFLTVFTFITVMIRLFFVYHSGNELIFESVNISMAIWESNWHEQSPQIKSMMLLVMRRAQKPLCYTIGGFVMSL  
QSVAILKATYSYVSIIFRQ
